# Supplementary material
Source: publisher site journal article supplement (https://www.dovepress.com/article/344165)
Supplement: Supplementary file 1 [file get_supplementary_file.php]

# Supplementary data

**Table S1** Distribution of ceftazidime/avibactam MIC values for Enterobacterales strains, specifying ESBL-positive, MDR and CRE strains

| **Organism** | **MIC frequency distribution - absolute** | | | | | | | | | | | | | | |
| --- | --- | --- | --- | --- | --- | --- | --- | --- | --- | --- | --- | --- | --- | --- | --- |
| **0.015** | **0.03** | **0.06** | **0.12** | **0.25** | **0.5** | **1** | **2** | **4** | **8** | **16** | **32** | **64** | **128** | **256** |
| Enterobacterales (n=1523) | 52 | 123 | 313 | 425 | 283 | 178 | 89 | 36 | 6 | 1 | 0 | 0 | 1 | 0 | 16 |
| Enterobacterales MDR (n=674) | 6 | 12 | 60 | 118 | 174 | 160 | 84 | 36 | 6 | 1 | 0 | 0 | 1 | 0 | 16 |
| Enterobacterales ESBL (n=434) |  | 3 | 23 | 65 | 134 | 115 | 53 | 20 | 4 | 1 | 0 | 0 | 1 | 0 | 15 |
| Enterobacterales CRE (n=23) |  |  |  | 1 | 0 | 1 | 2 | 5 | 1 | 1 | 0 | 0 | 0 | 0 | 12 |

**Table S2** Antimicrobial susceptibility (Enterobacterales) to ceftazidime/avibactam stratified by age

| **Organism** | **0-18** | | **>18** | | **61+** | |
| --- | --- | --- | --- | --- | --- | --- |
| **n** | **% S** | **n** | **% S** | **n** | **% S** |
| Enterobacterales (n=1523) | 529 | 99.2 | 999 | 98.7 | 669 | 99.0 |
| Enterobacterales MDR (n=674) | 194 | 97.9 | 480 | 97.3 | 332 | 97.9 |
| Enterobacterales ESBL (n=434) | 124 | 96.8 | 310 | 96.1 | 211 | 96.7 |
| Enterobacterales CRE (n=23) | 4 | 50.0 | 19 | 47.4 | 13 | 61.5 |

**Figure S1** Antimicrobial susceptibility (Enterobacterales) to ceftazidime/avibactam stratified by age


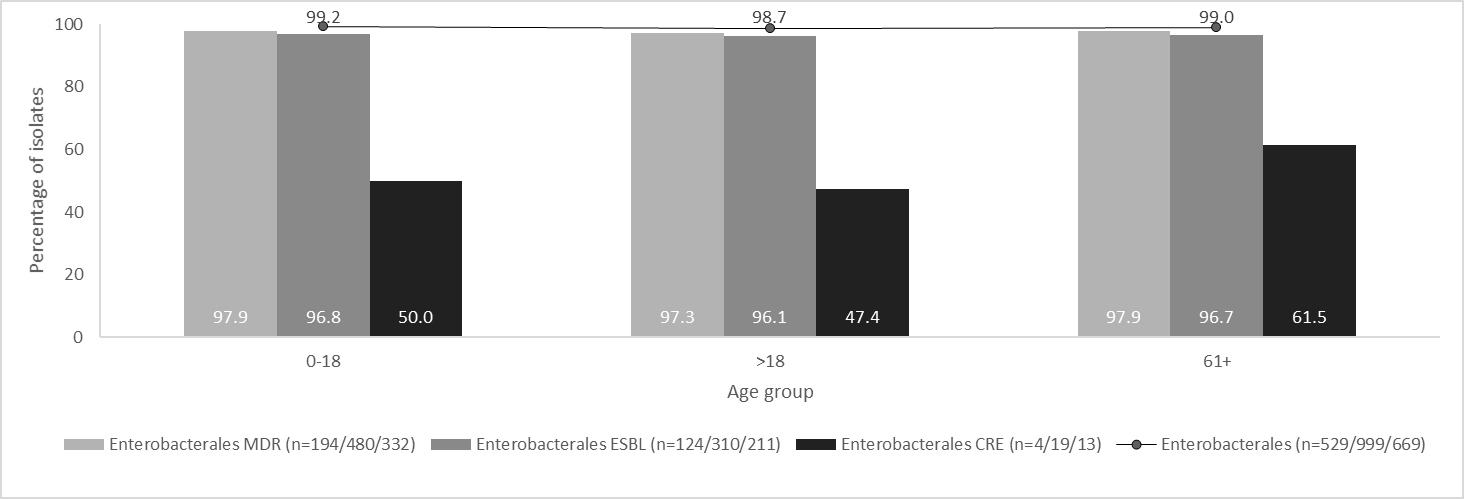


**Table S3** Distribution of ceftazidime/avibactam MIC values for the *P. aeruginosa* strains (specifying MDR, DTR and CR strains)

| **Organism** | **MIC frequency distribution - absolute** | | | | | | | | | | |
| --- | --- | --- | --- | --- | --- | --- | --- | --- | --- | --- | --- |
| **0.25** | **0.5** | **1** | **2** | **4** | **8** | **16** | **32** | **64** | **128** | **256** |
| *P. aeruginosa* (n=523) | 2 | 10 | 105 | 202 | 96 | 52 | 22 | 13 | 6 | 7 | 8 |
| *P. aeruginosa* MDR (n=164) |  | 1 | 3 | 15 | 40 | 49 | 22 | 13 | 6 | 7 | 8 |
| *P. aeruginosa* DTR (n=96) |  |  | 2 | 4 | 16 | 26 | 18 | 9 | 6 | 7 | 8 |
| *P. aeruginosa* CR (n=93) |  |  |  | 2 | 22 | 27 | 16 | 7 | 5 | 6 | 8 |

**Table S4** Antimicrobial susceptibility (*P. aeruginosa*) to ceftazidime/avibactam stratified by age

| **Organism** | **0-18** | | **>18** | | **61+** | |
| --- | --- | --- | --- | --- | --- | --- |
| **n** | **% S** | **n** | **% S** | **n** | **% S** |
| *P. aeruginosa* (n=523) | 194 | 93.3 | 327 | 86.9 | 196 | 87.8 |
| *P. aeruginosa* MDR (n=164) | 40 | 67.5 | 124 | 65.3 | 72 | 66.7 |
| *P. aeruginosa* DTR (n=96) | 20 | 50.0 | 76 | 50.0 | 42 | 50.0 |
| *P. aeruginosa* CR (n=93) | 26 | 69.2 | 67 | 49.3 | 36 | 47.2 |
